# Supplementary material for: Assessment of Surfactant Removal Capacity and Microbial Community Diversity in a Greywater-Treating Constructed Wetland
Source: MDPI journal article supplement (doi:10.3390/resources12030038), 2023-03-19
Supplement: s1 [file s1]

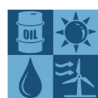

---

## Supplementary Material

**Table S1.** pH and Temperature values at different sampling points. (n=50).

| Parameter               | P1            | P3            | P5            |
|-------------------------|---------------|---------------|---------------|
| pH (50)                 | 7.16±0.71     | 7.10±0.36     | 7.67±0.39     |
| Temperature °C (50)     | 24.8±4.1      | 24.7±2.9      | 24.7±2.8      |
| Redox potential mV (50) | -28.04±218.74 | -302.63±39.12 | -260.24±53.10 |

---

**Table S2.** Number of OTUs and % distribution among the 6 biomass samples. Microbial genera are divided into three groups based on functional pathway.

| Group                                                 | Genus                                    | C-AnC |       | C-G2 |       | C-Soil |       | C-Slag |       | CW-In |       | CW-Out |       |
|-------------------------------------------------------|------------------------------------------|-------|-------|------|-------|--------|-------|--------|-------|-------|-------|--------|-------|
| Hydrolysis, fermentation, syntrophy, and acetogenesis | <i>Acinetobacter</i>                     | 12    | 0.03% | 13   | 0.71% | 13     | 0.38% | 13     | 0.35% | 12    | 0.23% | 9      | 0.15% |
|                                                       | <i>Aminiphilus</i>                       | 5     | 0.01% | 4    | 0.22% | 3      | 0.09% | 3      | 0.08% | 4     | 0.08% | 3      | 0.05% |
|                                                       | <i>Aminivibrio</i>                       | 6     | 0.02% | 6    | 0.33% | 5      | 0.15% | 6      | 0.16% | 6     | 0.12% | 5      | 0.08% |
|                                                       | <i>Aminomonas</i>                        | 6     | 0.02% | 5    | 0.27% | 3      | 0.09% | 3      | 0.08% | 5     | 0.10% | 6      | 0.10% |
|                                                       | <i>Bacteroides</i>                       | 9     | 0.02% | 39   | 2.14% | 10     | 0.29% | 35     | 0.93% | 10    | 0.20% | 1      | 0.02% |
|                                                       | <i>Christensenellaceae_R-7_group</i>     | 42    | 0.11% | 31   | 1.70% | 16     | 0.47% | 42     | 1.12% | 16    | 0.31% | 28     | 0.47% |
|                                                       | <i>Cloacibacillus</i>                    | 9     | 0.02% | 9    | 0.49% | 5      | 0.15% | 6      | 0.16% | 9     | 0.18% | 9      | 0.15% |
|                                                       | <i>Faecalibacterium</i>                  | 2     | 0.01% | 3    | 0.16% | 3      | 0.09% | 3      | 0.08% | 3     | 0.06% | 1      | 0.02% |
|                                                       | <i>Lactivibrio</i>                       | 3     | 0.01% | 3    | 0.16% | 3      | 0.09% | 3      | 0.08% | 3     | 0.06% | 3      | 0.05% |
|                                                       | <i>Microbacterium</i>                    | 3     | 0.01% | 3    | 0.16% | 3      | 0.09% | 3      | 0.08% | 3     | 0.06% | 3      | 0.05% |
|                                                       | <i>Paenisporsarcina</i>                  | 1     | 0.00% | 1    | 0.05% | 2      | 0.06% | 2      | 0.05% | 3     | 0.06% | 3      | 0.05% |
|                                                       | <i>Prevotella_9</i>                      | 0     | 0.00% | 1    | 0.05% | 1      | 0.03% | 0      | 0.00% | 1     | 0.02% | 0      | 0.00% |
|                                                       | <i>Rhodopseudomonas</i>                  | 10    | 0.03% | 6    | 0.33% | 3      | 0.09% | 5      | 0.13% | 7     | 0.14% | 9      | 0.15% |
|                                                       | <i>Roseburia</i>                         | 3     | 0.01% | 9    | 0.49% | 2      | 0.06% | 7      | 0.19% | 3     | 0.06% | 0      | 0.00% |
|                                                       | <i>Ruminococcaceae_UCG-002</i>           | 4     | 0.01% | 9    | 0.49% | 3      | 0.09% | 6      | 0.16% | 3     | 0.06% | 4      | 0.07% |
|                                                       | <i>Sediminibacterium</i>                 | 0     | 0.00% | 2    | 0.11% | 3      | 0.09% | 1      | 0.03% | 2     | 0.04% | 1      | 0.02% |
|                                                       | <i>Syntrophus</i>                        | 11    | 0.03% | 15   | 0.82% | 15     | 0.44% | 12     | 0.32% | 17    | 0.33% | 14     | 0.23% |
|                                                       | <i>Thermovirga</i>                       | 5     | 0.01% | 6    | 0.33% | 1      | 0.03% | 6      | 0.16% | 1     | 0.02% | 7      | 0.12% |
| Methanogenesis                                        | <i>unidentified_Synergistaceae</i>       | 15    | 0.04% | 13   | 0.71% | 10     | 0.29% | 15     | 0.40% | 13    | 0.25% | 16     | 0.27% |
|                                                       | <i>vadinBC27_wastewater-sludge_group</i> | 10    | 0.03% | 8    | 0.44% | 4      | 0.12% | 9      | 0.24% | 6     | 0.12% | 9      | 0.15% |
|                                                       | <i>Methanobacterium</i>                  | 11    | 0.03% | 11   | 0.60% | 4      | 0.12% | 11     | 0.29% | 10    | 0.20% | 12     | 0.20% |
|                                                       | <i>Methanobrevibacter</i>                | 3     | 0.01% | 3    | 0.16% | 1      | 0.03% | 3      | 0.08% | 3     | 0.06% | 2      | 0.03% |
|                                                       | <i>Methanomethylovorans</i>              | 3     | 0.01% | 3    | 0.16% | 1      | 0.03% | 3      | 0.08% | 3     | 0.06% | 2      | 0.03% |

| Group                                                                          | Genus                              | C-AnC |        | C-G2 |        | C-Soil |        | C-Slag |        | CW-In |        | CW-Out |        |
|--------------------------------------------------------------------------------|------------------------------------|-------|--------|------|--------|--------|--------|--------|--------|-------|--------|--------|--------|
|                                                                                | <i>Methanosaeta</i>                | 8     | 0.02%  | 16   | 0.88%  | 6      | 0.17%  | 12     | 0.32%  | 15    | 0.29%  | 11     | 0.18%  |
|                                                                                | <i>Methanosarcina</i>              | 3     | 0.01%  | 3    | 0.16%  | 1      | 0.03%  | 2      | 0.05%  | 2     | 0.04%  | 2      | 0.03%  |
|                                                                                | <i>Methanospirillum</i>            | 11    | 0.03%  | 11   | 0.60%  | 5      | 0.15%  | 9      | 0.24%  | 8     | 0.16%  | 11     | 0.18%  |
| Surfactants degraders (related to anaerobic degradation of aromatic compounds) | <i>Acinetobacter lwoffii</i>       | 85    | 0.23%  | 92   | 5.04%  | 6      | 0.17%  | 156    | 4.17%  | 4     | 0.08%  | 9      | 0.15%  |
|                                                                                | <i>Acinetobacter schindleri</i>    | 6     | 0.02%  | 69   | 3.78%  | 1989   | 57.97% | 234    | 6.25%  | 137   | 2.68%  | 121    | 2.02%  |
|                                                                                | <i>Acinetobacter townneri</i>      | 7     | 0.02%  | 2    | 0.11%  | 3      | 0.09%  | 7      | 0.19%  | 2     | 0.04%  | 0      | 0.00%  |
|                                                                                | <i>Acinetobacter ursingii</i>      | 34    | 0.09%  | 61   | 3.34%  | 472    | 13.76% | 104    | 2.78%  | 71    | 1.39%  | 26     | 0.43%  |
|                                                                                | <i>Dechloromonas agitata</i>       | 0     | 0.00%  | 3    | 0.16%  | 31     | 0.90%  | 3      | 0.08%  | 4     | 0.08%  | 0      | 0.00%  |
|                                                                                | <i>Geobacter lovleyi</i>           | 70    | 0.19%  | 112  | 6.13%  | 124    | 3.61%  | 463    | 12.36% | 86    | 1.68%  | 29     | 0.48%  |
|                                                                                | <i>Geobacter pickeringii</i>       | 0     | 0.00%  | 0    | 0.00%  | 9      | 0.26%  | 0      | 0.00%  | 0     | 0.00%  | 1      | 0.02%  |
|                                                                                | <i>Geobacter</i> sp. AOG5          | 72    | 0.20%  | 56   | 3.07%  | 125    | 3.64%  | 309    | 8.25%  | 85    | 1.66%  | 189    | 3.16%  |
|                                                                                | <i>Geobacter</i> sp. OR-1          | 0     | 0.00%  | 1    | 0.05%  | 5      | 0.15%  | 2      | 0.05%  | 0     | 0.00%  | 8      | 0.13%  |
|                                                                                | <i>Pseudomonas alcaligenes</i>     | 0     | 0.00%  | 20   | 1.10%  | 2      | 0.06%  | 44     | 1.17%  | 4     | 0.08%  | 1      | 0.02%  |
|                                                                                | <i>Pseudomonas caeni</i>           | 0     | 0.00%  | 20   | 1.10%  | 0      | 0.00%  | 23     | 0.61%  | 0     | 0.00%  | 0      | 0.00%  |
|                                                                                | <i>Pseudomonas japonica</i>        | 6     | 0.02%  | 8    | 0.44%  | 164    | 4.78%  | 20     | 0.53%  | 10    | 0.20%  | 11     | 0.18%  |
|                                                                                | <i>Pseudomonas psychrotolerans</i> | 5     | 0.01%  | 13   | 0.71%  | 40     | 1.17%  | 16     | 0.43%  | 13    | 0.25%  | 7      | 0.12%  |
|                                                                                | <i>Pseudoxanthomonas mexicana</i>  | 14    | 0.04%  | 17   | 0.93%  | 178    | 5.19%  | 77     | 2.06%  | 36    | 0.70%  | 107    | 1.79%  |
|                                                                                | <i>Rhodopseudomonas palustris</i>  | 35905 | 98.29% | 980  | 53.67% | 26     | 0.76%  | 1933   | 51.62% | 4365  | 85.25% | 5149   | 86.10% |
|                                                                                | <i>Desulfitobacterium</i>          | 1     | 0.00%  | 2    | 0.11%  | 1      | 0.03%  | 3      | 0.08%  | 3     | 0.06%  | 1      | 0.02%  |
|                                                                                | <i>Desulfobacca</i>                | 0     | 0.00%  | 1    | 0.05%  | 2      | 0.06%  | 0      | 0.00%  | 0     | 0.00%  | 1      | 0.02%  |
|                                                                                | <i>Desulfomicrobium</i>            | 6     | 0.02%  | 6    | 0.33%  | 5      | 0.15%  | 6      | 0.16%  | 6     | 0.12%  | 6      | 0.10%  |
|                                                                                | <i>Desulfomonile</i>               | 18    | 0.05%  | 18   | 0.99%  | 18     | 0.52%  | 20     | 0.53%  | 21    | 0.41%  | 27     | 0.45%  |
|                                                                                | <i>Desulforegula</i>               | 3     | 0.01%  | 6    | 0.33%  | 4      | 0.12%  | 6      | 0.16%  | 6     | 0.12%  | 4      | 0.07%  |
|                                                                                | <i>Desulforhabdus</i>              | 3     | 0.01%  | 3    | 0.16%  | 3      | 0.09%  | 3      | 0.08%  | 3     | 0.06%  | 3      | 0.05%  |

| Group                      | Genus                                     | C-AnC |       | C-G2 |       | C-Soil |       | C-Slag |       | CW-In |       | CW-Out |       |   |
|----------------------------|-------------------------------------------|-------|-------|------|-------|--------|-------|--------|-------|-------|-------|--------|-------|---|
| Sulphate Reducing Bacteria | <i>Desulfovibrio</i>                      | 66    | 0.18% | 73   | 4.00% | 62     | 1.81% | 67     | 1.79% | 61    | 1.19% | 71     | 1.19% |   |
|                            | <i>Desulfovirga</i>                       | 4     | 0.01% | 2    | 0.11% | 6      | 0.17% | 1      | 0.03% | 5     | 0.10% | 5      | 0.08% |   |
|                            | <i>Smithella</i>                          | 3     | 0.01% | 3    | 0.16% | 3      | 0.09% | 3      | 0.08% | 3     | 0.06% | 3      | 0.05% |   |
|                            | <i>Syntrophobacter</i>                    | 2     | 0.01% | 3    | 0.16% | 3      | 0.09% | 3      | 0.08% | 3     | 0.06% | 2      | 0.03% |   |
|                            | <i>Rhodoblastus</i>                       | 12    | 0.03% | 10   | 0.55% | 10     | 0.29% | 12     | 0.32% | 10    | 0.20% | 10     | 0.17% |   |
|                            | <i>Roseobacter_clade_CHAB-I-5_lineage</i> | 5     | 0.01% | 7    | 0.38% | 6      | 0.17% | 5      | 0.13% | 5     | 0.10% | 9      | 0.15% |   |
|                            | <i>Sulphuricurvum</i>                     | 0     | 0.00% | 0    | 0.00% | 0      | 0.00% | 0      | 0.00% | 0     | 0.00% | 0      | 0.00% |   |
|                            | <i>Thiobacillus</i>                       | 9     | 0.02% | 5    | 0.27% | 8      | 0.23% | 5      | 0.13% | 9     | 0.18% | 9      | 0.15% |   |
| Number of OTU              |                                           | 36531 |       | 1    | 1826  | 1      | 3431  | 1      | 3745  | 1     | 5120  | 1      | 5980  | 1 |

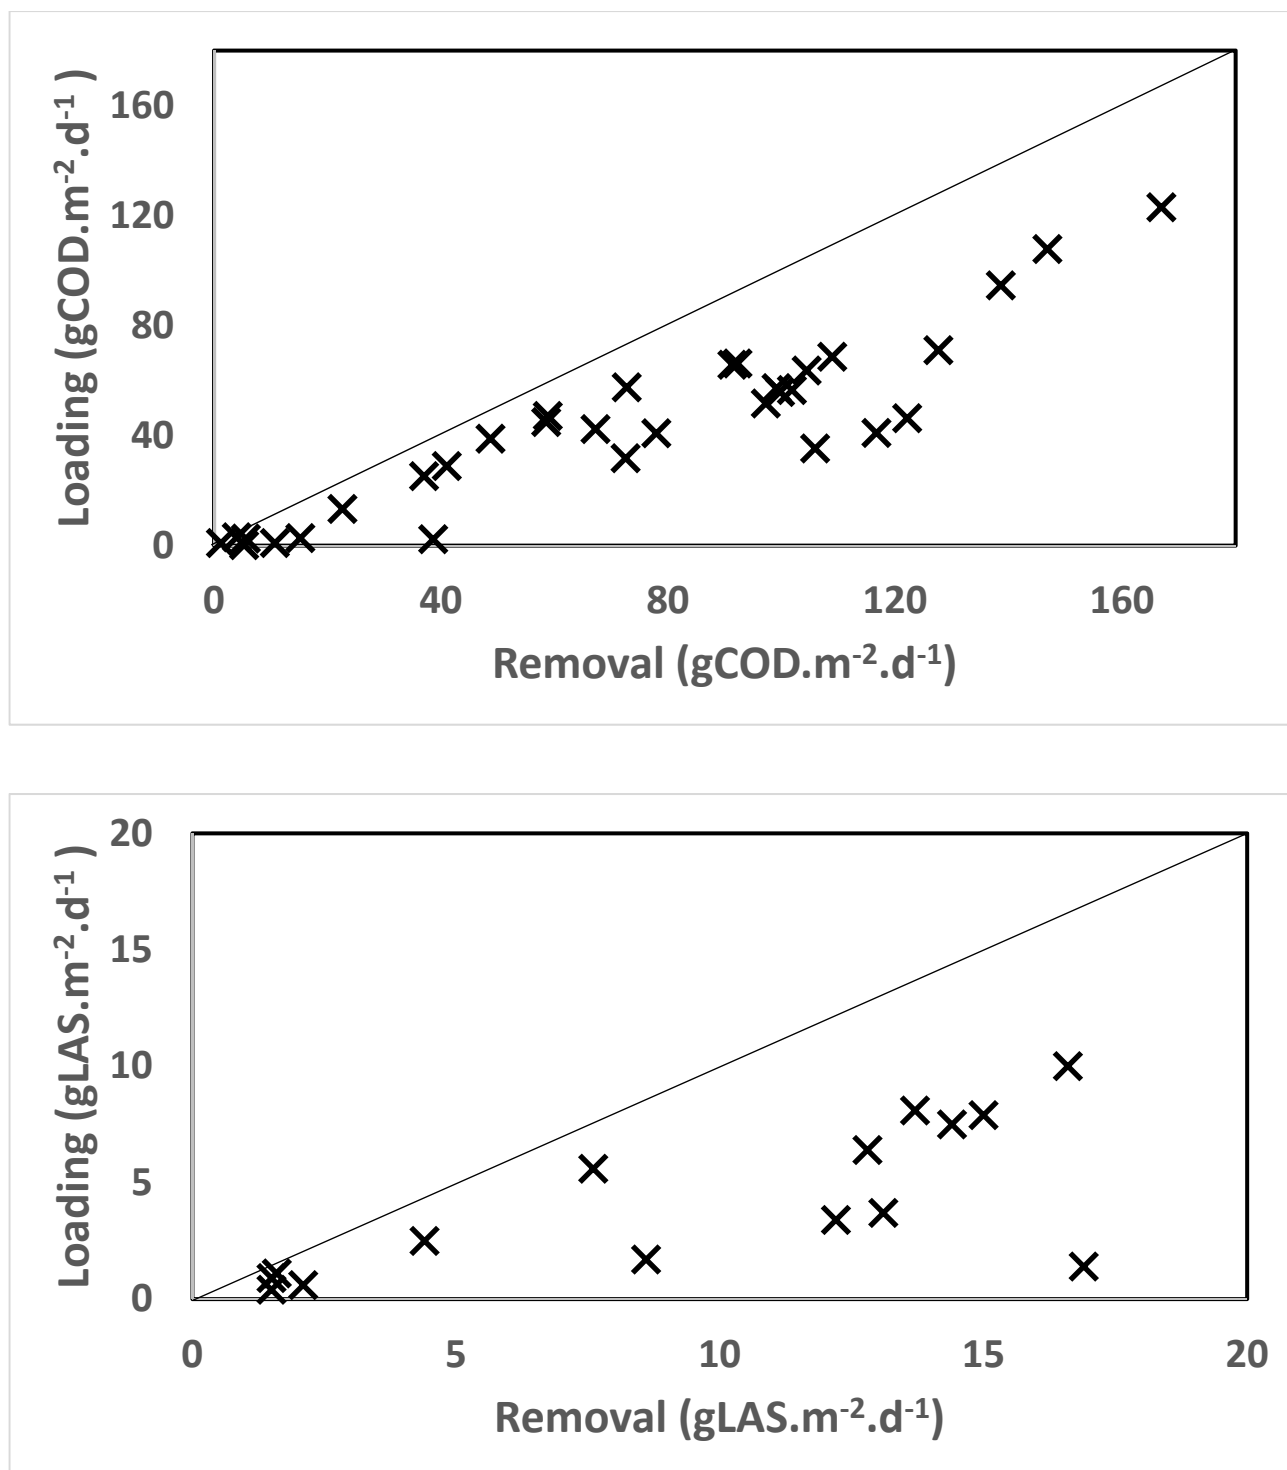

**Figure S1.** Top: Correlation between loading and removal in the EvaTAC system. Top: organic load applied (loading) and removed (removal) for chemical oxygen demand (COD). Bottom: LAS load applied (loading) and removed (removal) for linear alkyl benzene sulfonate (LAS).
